# Supplementary material for: Facilitating validation of prediction models: a comparison of manual and semi-automated validation using registry-based data of breast cancer patients in the Netherlands
Source: Springer Nature journal article supplement (doi:10.1186/s12874-019-0761-5), 2019-06-08
Supplement: MOESM1 [file 16785020]

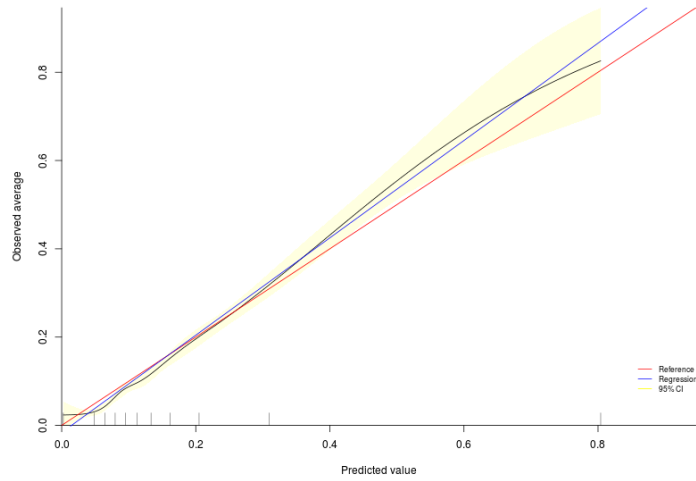

Intercept = -0.03, slope = 1.09

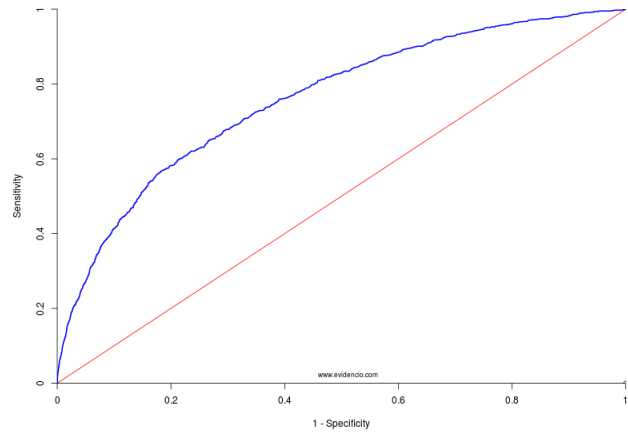

Area under the curve = 0.76

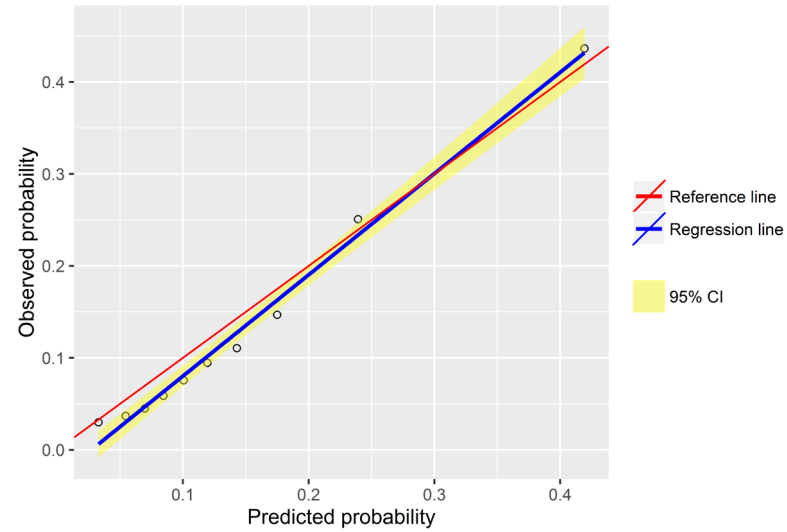

Intercept = -0.02, slope = 1.12

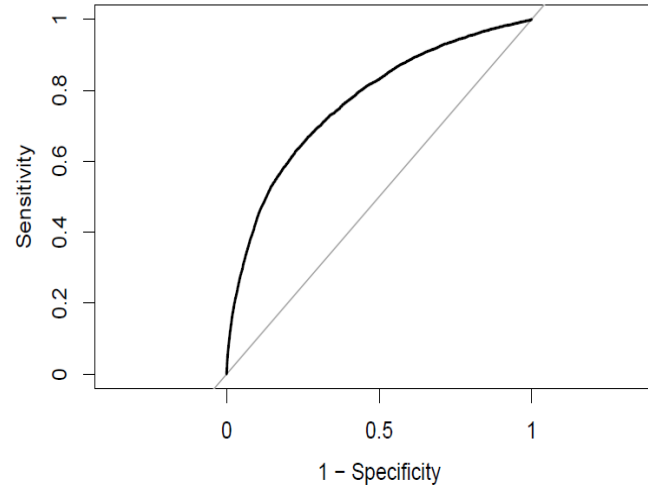

Area under the curve = 0.76

Supplementary Figure 1. Calibration and discrimination of CancerMath's prediction tool for 5-year overall survival. The left panels show the results of the semi-automated validation using Evidencio's validation tool, the right panels show the results of the manual validation in R. Please note the different distribution of axes for the calibration figures.

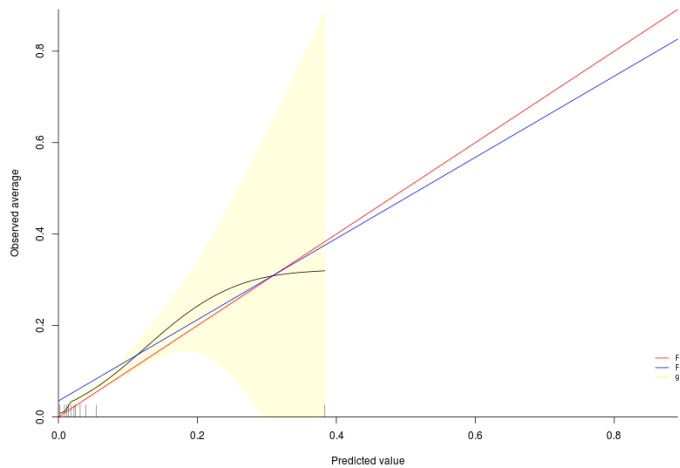

Intercept = -0.01, slope = 1.06

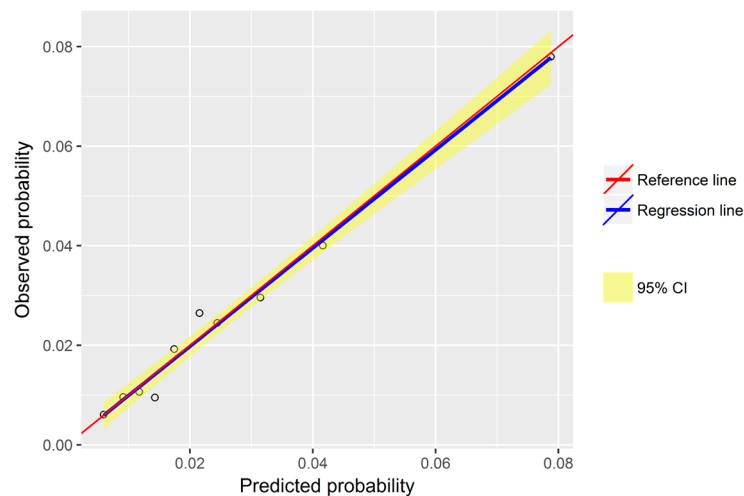

Intercept = -0.01, slope = 1.06

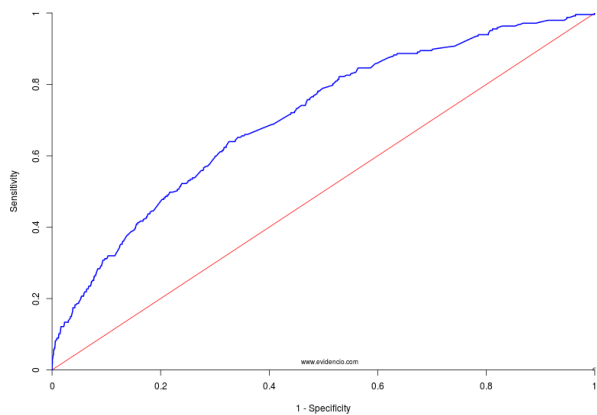

Area under the curve = 0.74

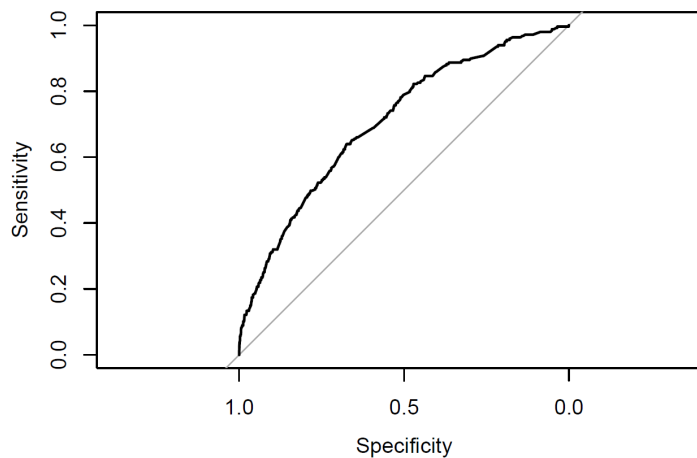

Area under the curve = 0.74

Supplementary Figure 2. Calibration and discrimination of the INFLUENCE prediction tool for the 5-year risk on locoregional recurrence. The left panels show the results of the semi-automated validation using Evidencio's validation tool, the right panels show the results of the manual validation in R. Please note the different distribution of axes for the calibration figures.

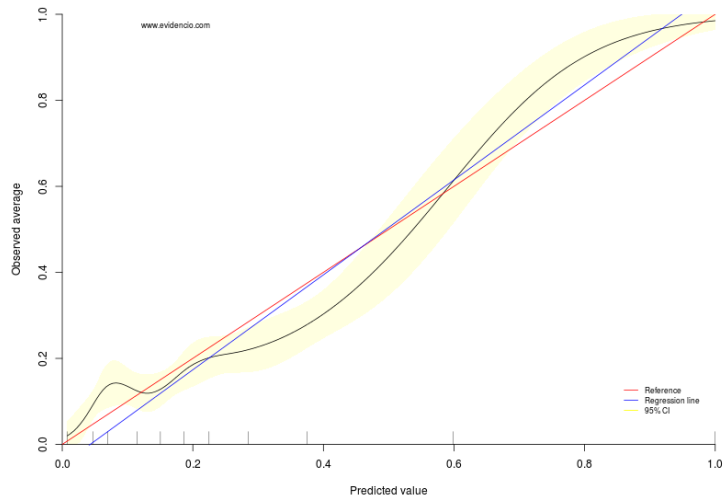

Intercept = 0, slope = 0.98

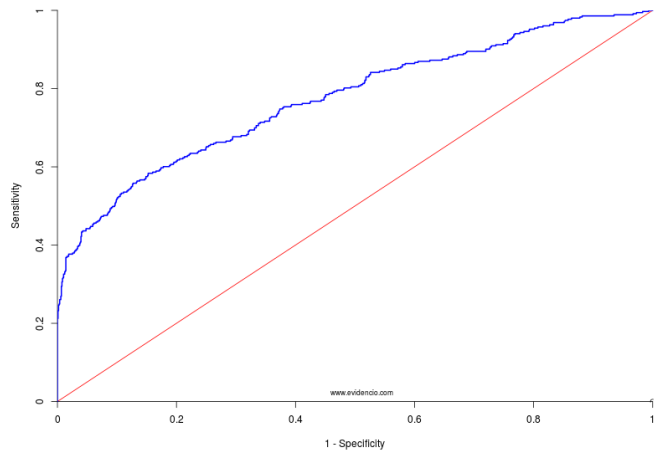

Area under the curve = 0.77

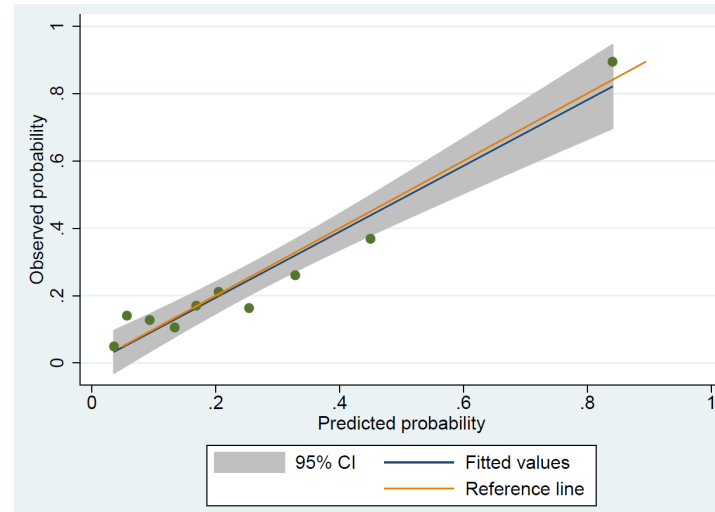

Intercept = 0, slope = 0.99

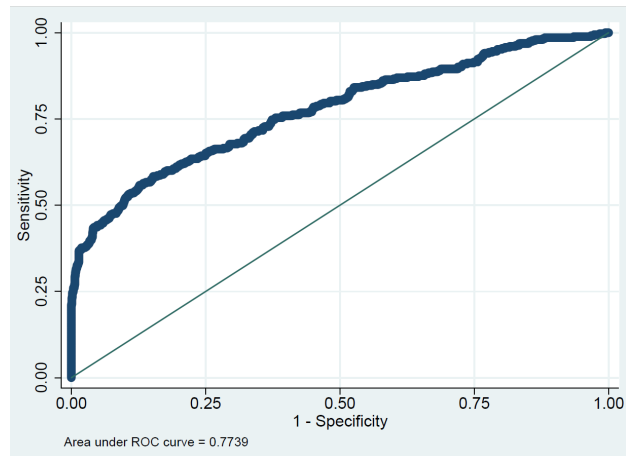

Area under the curve = 0.77

Supplementary Figure 3. Calibration and discrimination of the PPAM prediction tool for the risk on axillary lymph node metastasis. The left panels show the results of the semi-automated validation using Evidencio's validation tool, the right panels show the results of the manual validation in Stata.

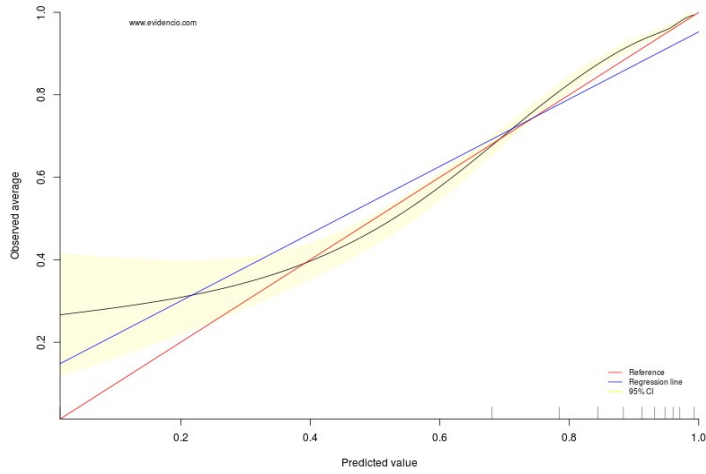

Intercept = -0.01, slope = 1.03

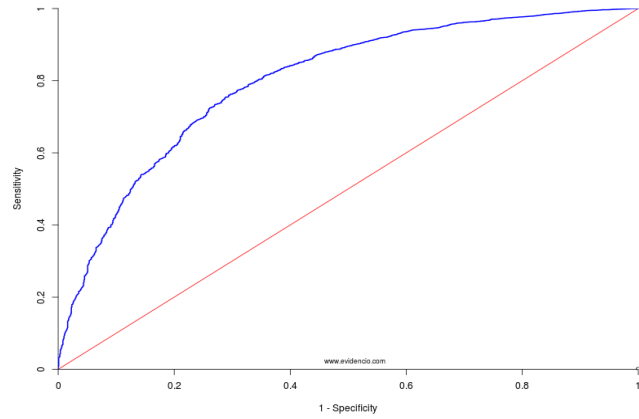

Area under the curve: 0.80

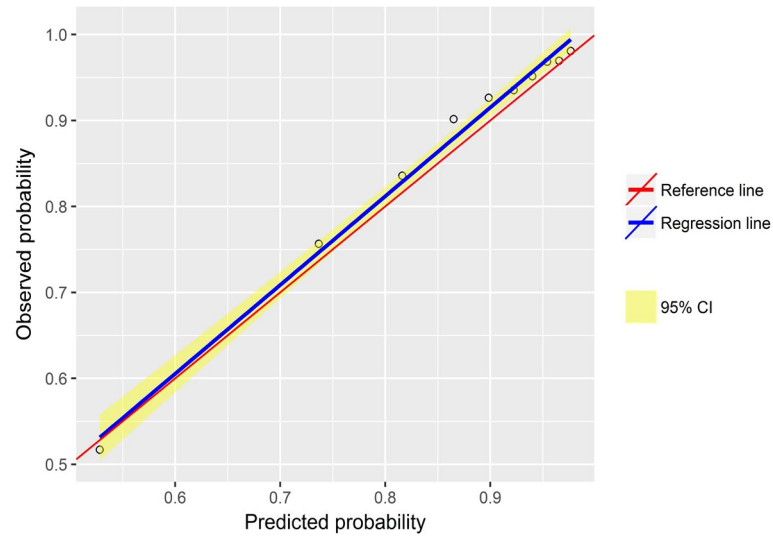

Intercept: = -0.01, slope = 1.02

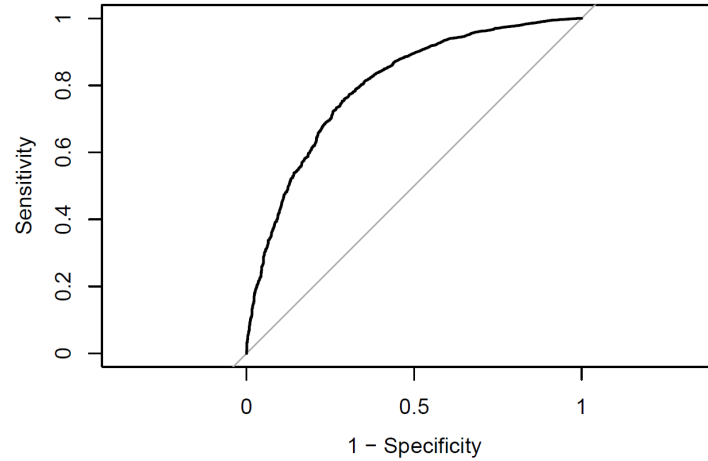

Area under the curve 0.80

Supplementary Figure 4. Calibration and discrimination of PREDICT's prediction tool for 5-year overall survival. The left panels show the results of the semi-automated validation using Evidencio's validation tool, the right panels show the results of the manual validation in R. Please note the different distribution of axes for the calibration figures.
